# Supplementary material
Source: Springer Nature journal article supplement (https://www.springermedizin.de/resource/supplementary/12889_2013_5549_MOESM6_ESM.pdf/9495640)
Supplement: MOESM6 [file 9495640]

| ATC-Class                                                                  | Off-label use |             |            |             |             |            |              |             | In-label use |             | Total         |
|----------------------------------------------------------------------------|---------------|-------------|------------|-------------|-------------|------------|--------------|-------------|--------------|-------------|---------------|
|                                                                            | Indication    |             | Age        |             | Over-dosing |            | Under-dosing |             | n            | %           | n             |
|                                                                            | n             | %           | n          | %           | n           | %          | n            | %           |              |             |               |
| <b>Total</b>                                                               | <b>541</b>    | <b>4.3</b>  | <b>476</b> | <b>3.8%</b> | <b>583</b>  | <b>4.6</b> | <b>2,202</b> | <b>17.4</b> | <b>8,865</b> | <b>70.0</b> | <b>12,667</b> |
| <b>A00 ALIMENTARY TRACT and METABOLISM</b>                                 | <b>140</b>    | <b>4.8</b>  | <b>113</b> | <b>3.9%</b> | <b>86</b>   | <b>2.9</b> | <b>654</b>   | <b>22.4</b> | <b>1,933</b> | <b>66.1</b> | <b>2,926</b>  |
| A01 Stomatological preparations                                            | 47            | 2.8         | 80         | 4.7%        | 41          | 2.4        | 308          | 18.2        | 1215         | 71.9        | 1691          |
| A03 Antispasmodic and anticholinergic agents and propulsives               | 6             | 4.7         | 3          | 2.4         | 8           | 6.3        | 18           | 14.2        | 92           | 72.4        | 127           |
| A07 Antidiarrheals. Intestinal Antiinflammatory/Antiinfektive Agents       | 5             | 4.9         | 7          | 6.8         | 6           | 5.8        | 11           | 10.7        | 74           | 71.8        | 103           |
| A11 Vitamins                                                               | 35            | 5.1         | 10         | 1.4         | 18          | 2.6        | 218          | 31.5        | 411          | 59.4        | 692           |
| A12 Mineral Supplements                                                    | 42            | 22.5        | 4          | 2.1         | 6           | 3.2        | 84           | 44.9        | 51           | 27.3        | 187           |
| A14 Anabolic Agents for Systemic Use                                       | 0             | 0           | 0          | 0           | 0           | 0          | 0            | 0           | 2            | 100         | 2             |
| <b>B00 BLOOD and BLOOD FORMING ORGANS</b>                                  | <b>0</b>      | <b>0</b>    | <b>4</b>   | <b>5.5</b>  | <b>3</b>    | <b>4.1</b> | <b>17</b>    | <b>23.3</b> | <b>49</b>    | <b>67.1</b> | <b>73</b>     |
| <b>C00 CARDIOVASKULAR SYSTEM</b>                                           | <b>3</b>      | <b>5.2</b>  | <b>11</b>  | <b>19.0</b> | <b>3</b>    | <b>5.2</b> | <b>22</b>    | <b>37.9</b> | <b>19</b>    | <b>32.8</b> | <b>58</b>     |
| C01 Cardic Therapy                                                         | 0             | 0           | 0          | 0           | 0           | 0          | 3            | 30.0        | 7            | 70.0        | 10            |
| C05 Vasoprotectives                                                        | 1             | 4.0         | 0          | 0           | 1           | 4.0        | 17           | 68.0        | 6            | 24.0        | 25            |
| C07 Beta Blocking Agents                                                   | 1             | 10.0        | 7          | 70.0        | 0           | 0          | 1            | 10.0        | 1            | 10.0        | 10            |
| <b>D00 DERMATOLOGICALS</b>                                                 | <b>69</b>     | <b>4.4</b>  | <b>42</b>  | <b>2.7</b>  | <b>30</b>   | <b>1.9</b> | <b>344</b>   | <b>21.8</b> | <b>1,094</b> | <b>69.3</b> | <b>1579</b>   |
| D01 Antifungals for Dermatological Use                                     | 7             | 6.1         | 1          | 0.9         | 5           | 4.3        | 21           | 18.3        | 81           | 70.4        | 115           |
| D02 Emollients and Protectives                                             | 4             | 1.6         | 4          | 1.6         | 4           | 1.6        | 29           | 11.9        | 203          | 83.2        | 244           |
| D03 Preparations for Treatment of Wounds and Ulcers                        | 17            | 5.3         | 2          | 0.6         | 0           | 0          | 3            | 0.9         | 297          | 93.1        | 319           |
| D04 Antipruritics. incl. Antihistamines. Anesthetics etc.                  | 1             | 0.6         | 1          | 0.6         | 1           | 0.6        | 46           | 28.6        | 112          | 69.6        | 161           |
| D06 Antibiotics and Chemotherapeutics for Dermatological Use               | 10            | 11.6        | 1          | 1.2         | 2           | 2.3        | 49           | 57.0        | 24           | 27.9        | 86            |
| D07 Corticosteroids. Dermatological Preparations                           | 23            | 10.2        | 15         | 6.6         | 13          | 5.8        | 95           | 42.0        | 80           | 35.4        | 226           |
| D10 Anti-Akne Preparations                                                 | 2             | 1.8         | 0          | 0           | 1           | 0.9        | 28           | 25.5        | 79           | 71.8        | 110           |
| D11 Other Dermatological Preparations                                      | 4             | 1.8         | 16         | 7.4         | 3           | 1.4        | 69           | 31.8        | 125          | 57.6        | 217           |
| <b>G00 GENITO URINARY SYSTEM and SEX HORMONES</b>                          | <b>52</b>     | <b>10.5</b> | <b>2</b>   | <b>0.4</b>  | <b>4</b>    | <b>0.8</b> | <b>8</b>     | <b>1.6</b>  | <b>431</b>   | <b>86.7</b> | <b>497</b>    |
| G03 Sex Hormones and Modulators of the Genital System                      | 48            | 10.6        | 1          | 0.2         | 3           | 0.7        | 2            | 0.4         | 398          | 88.1        | 452           |
| <b>H00 SYSTEMIC HORMONAL PREPARATIONS. excl. SEX HORMONES and INSULINS</b> | <b>6</b>      | <b>2.0</b>  | <b>0</b>   | <b>0</b>    | <b>7</b>    | <b>2.4</b> | <b>29</b>    | <b>9.8</b>  | <b>253</b>   | <b>85.8</b> | <b>2,,95</b>  |
| H03 Thyroid Therapy                                                        | 1             | 0.4         | 0          | 0           | 5           | 2.0        | 28           | 11.4        | 212          | 86.2        | 246           |
| <b>J00 ANTIINFECTIVES for SYSTEMIC USE</b>                                 | <b>25</b>     | <b>6.7</b>  | <b>5</b>   | <b>1.3</b>  | <b>21</b>   | <b>5.6</b> | <b>71</b>    | <b>19.0</b> | <b>252</b>   | <b>67.4</b> | <b>374</b>    |
| J01 Antibiotics for Systemic Use                                           | 25            | 7.5         | 4          | 1.2         | 21          | 6.3        | 71           | 21.3        | 212          | 63.7        | 333           |

|                                                       |           |             |            |            |            |            |            |             |             |             |              |
|-------------------------------------------------------|-----------|-------------|------------|------------|------------|------------|------------|-------------|-------------|-------------|--------------|
| <b>L00 ANTINEOPLASTIC and IMMUNOMODULATING AGENTS</b> | <b>8</b>  | <b>9.4</b>  | <b>7</b>   | <b>8.2</b> | <b>5</b>   | <b>5.9</b> | <b>24</b>  | <b>28.2</b> | <b>41</b>   | <b>48.2</b> | <b>85</b>    |
| L03 Immunostimulants                                  | 8         | 11.3        | 6          | 8.5        | 4          | 5.6        | 23         | 32.4        | 30          | 42.3        | 71           |
| <b>M00 MUSCULO-SKELETAL SYSTEM</b>                    | <b>11</b> | <b>2.0</b>  | <b>31</b>  | <b>5.6</b> | <b>8</b>   | <b>1.5</b> | <b>47</b>  | <b>8.5</b>  | <b>454</b>  | <b>82.4</b> | <b>551</b>   |
| M01 Antiinflammatory and Antirheumatic Products       | 2         | 0.8         | 16         | 6.4        | 6          | 2.4        | 26         | 10.4        | 200         | 80.0        | 250          |
| M02 Topical Products for Joint and Muscular Pain      | 7         | 2.5         | 14         | 5.0        | 1          | 0.4        | 16         | 5.7         | 242         | 86.4        | 280          |
| <b>N00 NERVOUS SYSTEM</b>                             | <b>28</b> | <b>2.6</b>  | <b>43</b>  | <b>3.9</b> | <b>11</b>  | <b>1.0</b> | <b>93</b>  | <b>8.5</b>  | <b>921</b>  | <b>84.0</b> | <b>1,096</b> |
| N02 Analgesics                                        | 11        | 1.4         | 30         | 3.9        | 5          | 0.6        | 66         | 8.5         | 664         | 85.6        | 776          |
| N06 Psychoanaleptics                                  | 7         | 3.8         | 2          | 1.1        | 0          | 0.0        | 9          | 4.9         | 167         | 90.3        | 185          |
| <b>R00 RESPIRATORY SYSTEM</b>                         | <b>94</b> | <b>2.4</b>  | <b>202</b> | <b>5.2</b> | <b>334</b> | <b>8.6</b> | <b>786</b> | <b>20.2</b> | <b>2477</b> | <b>63.6</b> | <b>3,893</b> |
| R01 Nasal Preparations                                | 13        | 1.3         | 55         | 5.5        | 18         | 1.8        | 60         | 6.1         | 845         | 85.3        | 991          |
| R02 Throat Preparations                               | 2         | 1.3         | 2          | 1.3        | 13         | 8.7        | 9          | 6.0         | 124         | 82.7        | 150          |
| R03 Anti-Asthmatics                                   | 20        | 3.5         | 46         | 8.0        | 16         | 2.8        | 72         | 12.6        | 419         | 73.1        | 573          |
| R04 Chest Ointments. Inhalatives                      | 3         | 1.0         | 35         | 11.3       | 0          | 0.0        | 108        | 34.7        | 165         | 53.1        | 311          |
| R05 Cough and Cold Preparations                       | 42        | 2.6         | 54         | 3.3        | 278        | 16.9       | 476        | 28.9        | 797         | 48.4        | 1647         |
| R06 Antihistamines for Systemic Use                   | 13        | 6.1         | 10         | 4.7        | 9          | 4.2        | 60         | 28.3        | 120         | 56.6        | 212          |
| <b>S00 SENSORY ORGANS</b>                             | <b>20</b> | <b>10.0</b> | <b>2</b>   | <b>1.0</b> | <b>10</b>  | <b>5.0</b> | <b>60</b>  | <b>30.0</b> | <b>108</b>  | <b>54.0</b> | <b>200</b>   |
| S01 Ophthalmologicals                                 | 19        | 13.4        | 2          | 1.4        | 2          | 1.4        | 47         | 33.1        | 72          | 50.7        | 142          |
| S02 Otologicals                                       | 1         | 1.9         | 0          | 0          | 7          | 13.5       | 11         | 21.2        | 33          | 63.5        | 52           |
| <b>V00 VARIOUS</b>                                    | <b>5</b>  | <b>2.3</b>  | <b>1</b>   | <b>0.5</b> | <b>6</b>   | <b>2.8</b> | <b>23</b>  | <b>10.6</b> | <b>183</b>  | <b>83.9</b> | <b>218</b>   |
| V03 All Other Therapeutic Products                    | 3         | 3.0         | 0          | 0          | 4          | 4.0        | 18         | 18.2        | 74          | 74.7        | 99           |
| V06 General Nutrients                                 | 0         | 0           | 1          | 2.0        | 2          | 4.0        | 5          | 10.0        | 42          | 84.0        | 50           |
| <b>Z00 HOMOEOPATHICS</b>                              | <b>80</b> | <b>10.0</b> | <b>11</b>  | <b>1.4</b> | <b>55</b>  | <b>6.9</b> | <b>23</b>  | <b>2.9</b>  | <b>631</b>  | <b>78.9</b> | <b>800</b>   |
